# Supplementary material for: In situ solid state formation of copper(I) coordination polymers by thermal reduction of copper(II) precursor compounds: structure and reactivity of [Cu(NCS)2(pyrimidine)2]n
Source: Royal Society of Chemistry journal article supplement (doi:10.1039/b909838k), 2009-01-01
Supplement: b909838k.pdf [file b909838k.pdf]

## Supporting Information

### **In situ Solid State Formation of Copper(I) Coordination Polymers by Thermal Reduction of Copper(II) Precursor Compounds: Structure and Reactivity of $[\text{Cu}(\text{NCS})_2(\text{pyrimidine})_2]_n$**

**Mario Wriedt and Christian Näther\***

- Selected bond lengths and angles for **1**.

(Table S1)

- Experimental and calculated XRPD patterns of compounds **1**, **2** and **3**.

(Figure S1 to S3)

- IR spectroscopic data of compounds **1**, **2**, **3** and all intermediates obtained in the first heating step.

(Figure S4 to S9)

- TG curve of compound **2**.

(Figure S10)

- Experimental XRPD pattern of the intermediate obtained in the first heating step of compound **2** in comparison with the experimental XRPD pattern of copper(I) thiocyanate and calculated XRPD pattern of  $[(\text{CuNCS})_2(\text{pyrazine})]_n$ .

(Figure S11)

**Table S1.** Selected bond lengths [Å] and angles [deg] for **1**.

|                   |            |                     |           |
|-------------------|------------|---------------------|-----------|
| Cu(1)-N(1)        | 2.040(2)   | Cu(2)-N(41)         | 1.949(3)  |
| Cu(1)-N(11)       | 2.054(2)   | Cu(2)-N(21)         | 2.060(3)  |
| Cu(1)-N(51)       | 1.957(3)   | Cu(2)-S(51)         | 2.9598(9) |
| Cu(1)-N(61)       | 1.954(3)   | Cu(3)-N(31)         | 2.061(3)  |
| Cu(1)-S(41)       | 2.8081(10) | Cu(3)-N(71)         | 1.930(3)  |
| Cu(1)-S(71)       | 3.1146(10) | Cu(3)-S(61)         | 2.9861(9) |
| N(61)-Cu(1)-N(51) | 177.48(14) | N(41)-Cu(2)-N(41A)  | 180       |
| N(61)-Cu(1)-N(1)  | 88.98(13)  | N(41)-Cu(2)-N(21A)  | 89.71(12) |
| N(51)-Cu(1)-N(1)  | 90.16(13)  | N(41)-Cu(2)-N(21)   | 90.29(12) |
| N(61)-Cu(1)-N(11) | 90.18(13)  | N(41A)-Cu(2)-N(21)  | 89.71(12) |
| N(51)-Cu(1)-N(11) | 90.47(13)  | N(21A)-Cu(2)-N(21)  | 180       |
| N(1)-Cu(1)-N(11)  | 174.86(12) | N(71B)-Cu(3)-N(71)  | 180       |
| N(61)-Cu(1)-S(41) | 89.73(9)   | N(71B)-Cu(3)-N(31B) | 90.28(12) |
| N(51)-Cu(1)-S(41) | 92.68(9)   | N(71)-Cu(3)-N(31B)  | 89.72(12) |
| N(1)-Cu(1)-S(41)  | 93.19(9)   | N(71)-Cu(3)-N(31)   | 90.28(12) |
| N(11)-Cu(1)-S(41) | 91.87(9)   |                     |           |
| N(41)-C(41)       | 1.159(4)   | C(41)-S(41)         | 1.635(3)  |
| C(41)-N(41)-Cu(2) | 168.1(3)   | N(41)-C(41)-S(41)   | 179.8(4)  |
| C(41)-S(41)-Cu(1) | 98.2(1)    |                     |           |
| N(51)-C(51)       | 1.161(4)   | C(51)-S(51)         | 1.638(3)  |
| C(51)-N(51)-Cu(1) | 165.3(3)   | N(51)-C(51)-S(51)   | 179.5(3)  |
| C(51)-S(51)-Cu(2) | 97.6(1)    |                     |           |
| N(61)-C(61)       | 1.163(4)   | C(61)-S(61)         | 1.641(3)  |
| C(61)-N(61)-Cu(1) | 173.2(3)   | N(61)-C(61)-S(61)   | 178.8(3)  |
| C(61)-S(61)-Cu(3) | 96.9(1)    |                     |           |
| N(71)-C(71)       | 1.170(4)   | S(71)-C(71)         | 1.627(3)  |
| C(71)-N(71)-Cu(3) | 169.6(3)   | N(71)-C(71)-S(71)   | 179.1(3)  |
| C(71)-S(71)-Cu(1) | 95.2(1)    |                     |           |

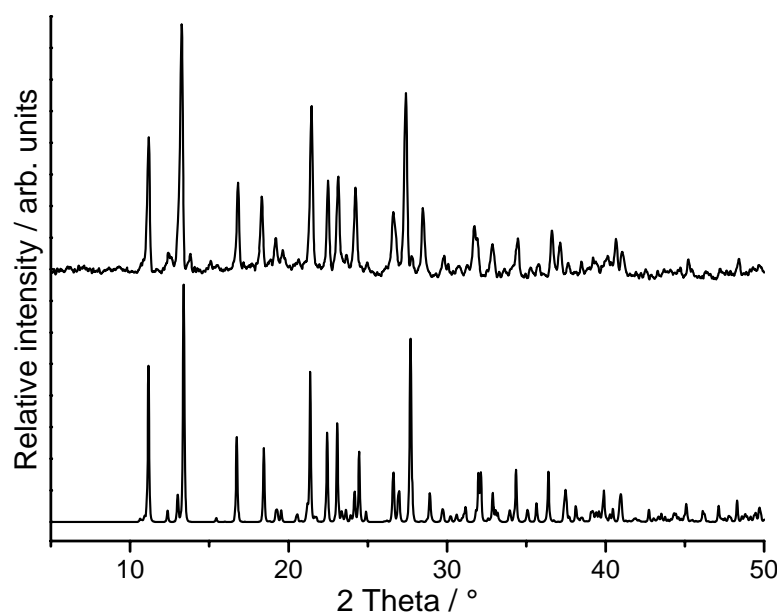

**Figure S1.** Experimental (top) and calculated (bottom) XRPD pattern of compound **1**.

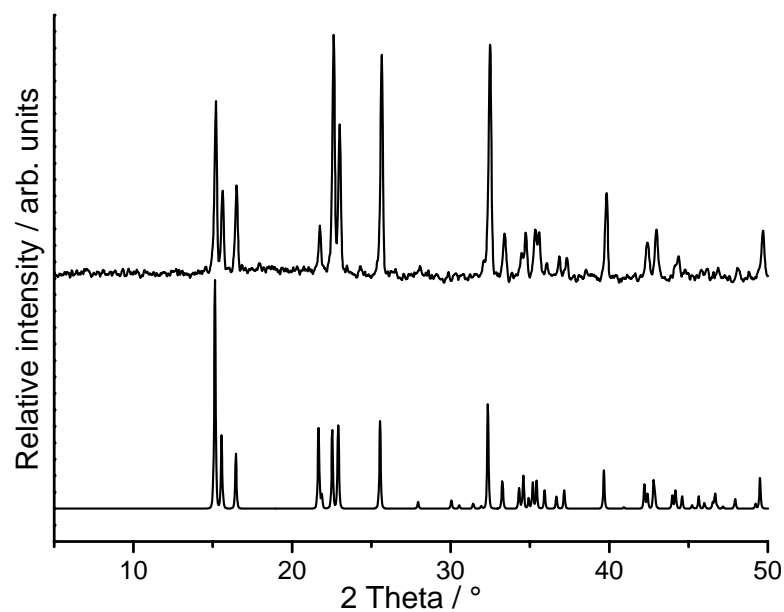

**Figure S2.** Experimental (top) and calculated (bottom) XRPD pattern of compound **2**.

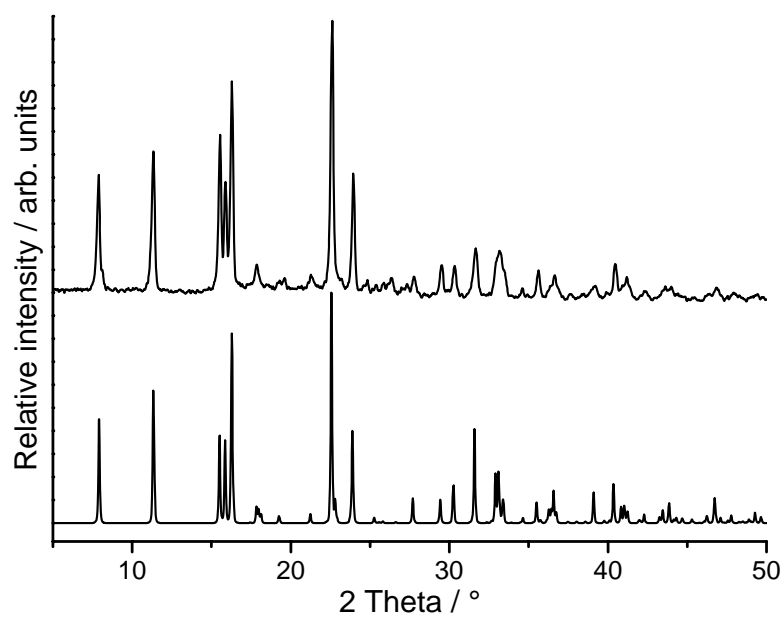

**Figure S3.** Experimental (top) and calculated (bottom) XRPD pattern of compound **3**.

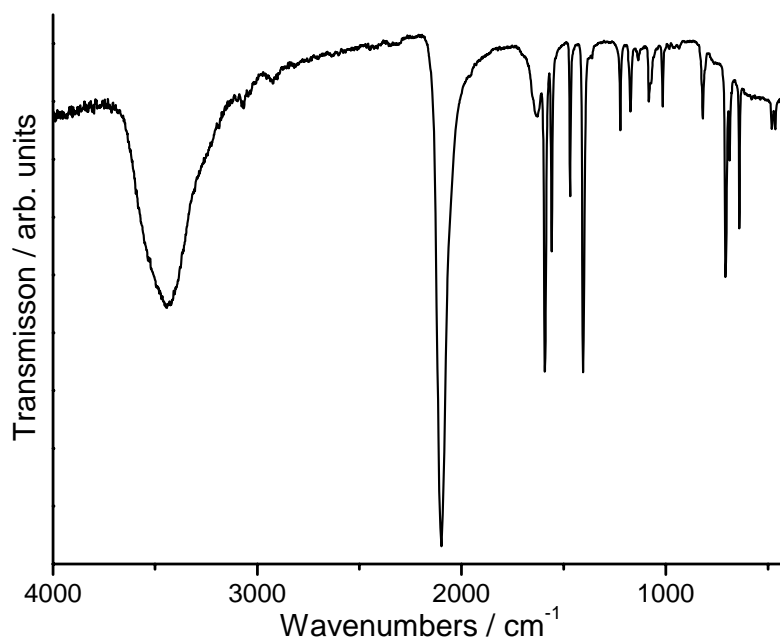

**Figure S4.** IR spectroscopic data of compound **1**.

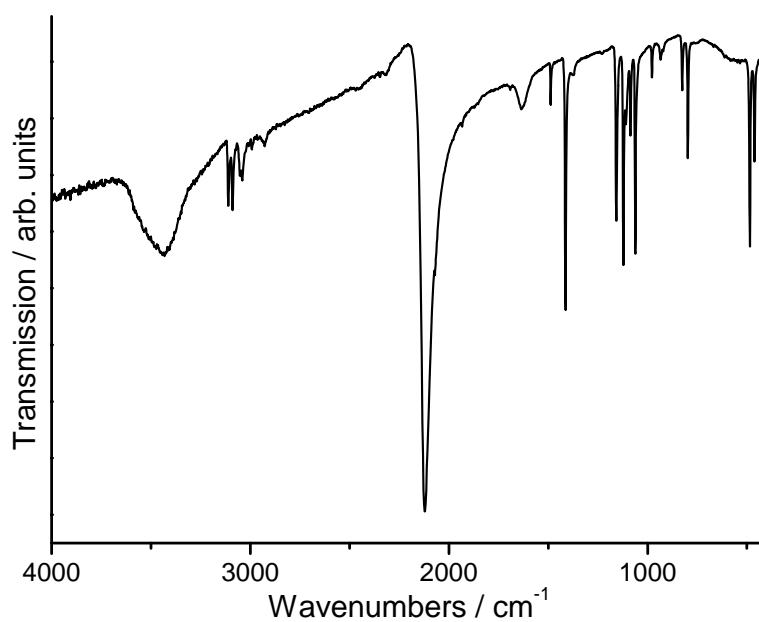

**Figure S5.** IR spectroscopic data of compound **2**.

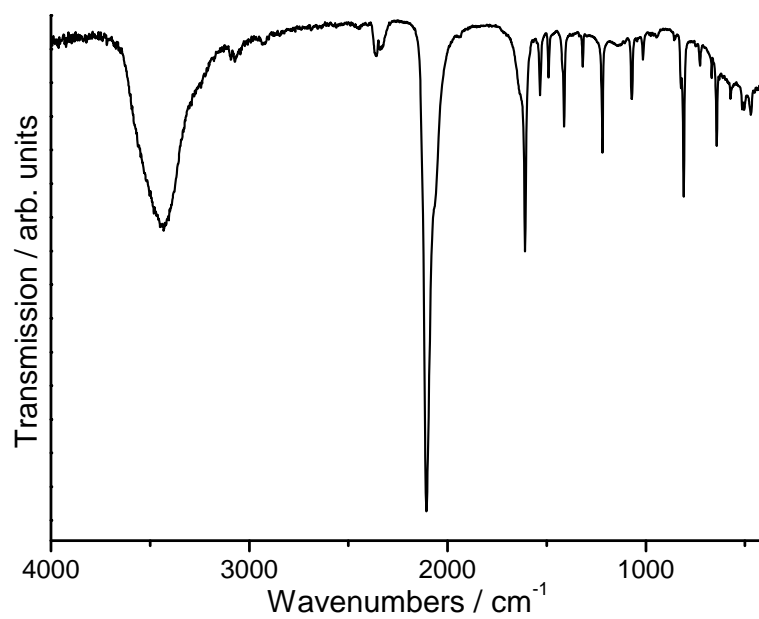

**Figure S6.** IR spectroscopic data of compound **3**.

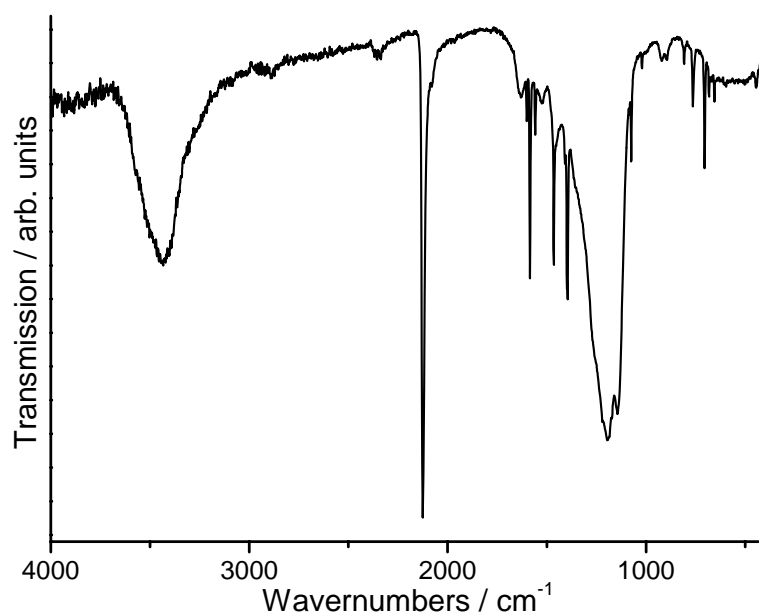

**Figure S7.** IR spectroscopic data of the intermediate obtained in the first heating step of compound **1**.

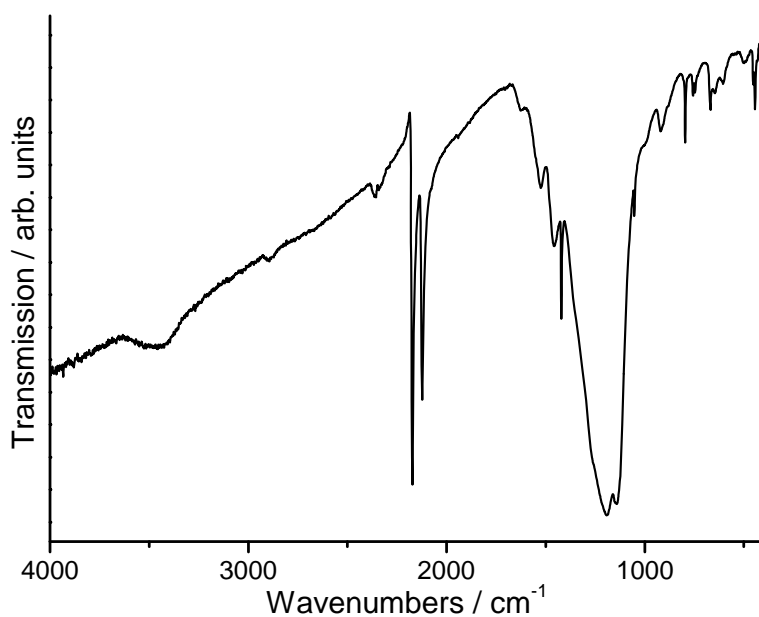

**Figure S8.** IR spectroscopic data of the intermediate obtained in the first heating step of compound **2**.

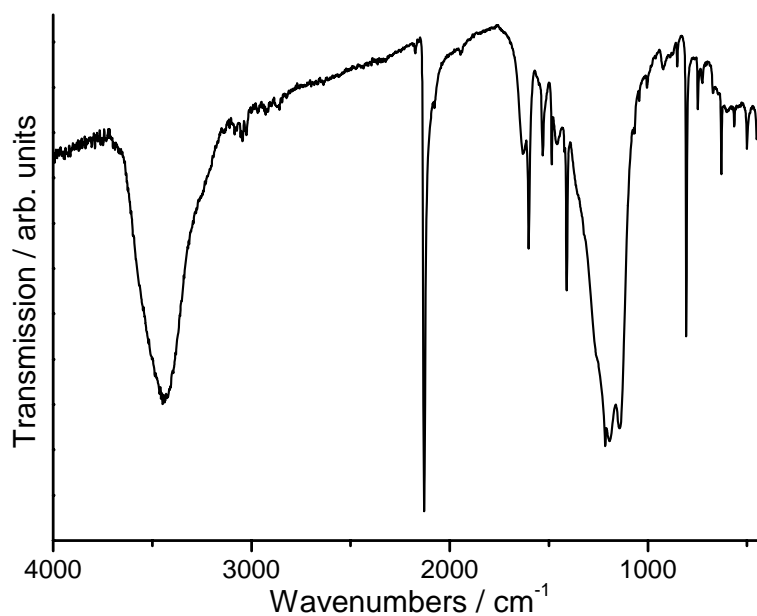

**Figure S9.** IR spectroscopic data of the intermediate obtained in the first heating step of compound **3**.

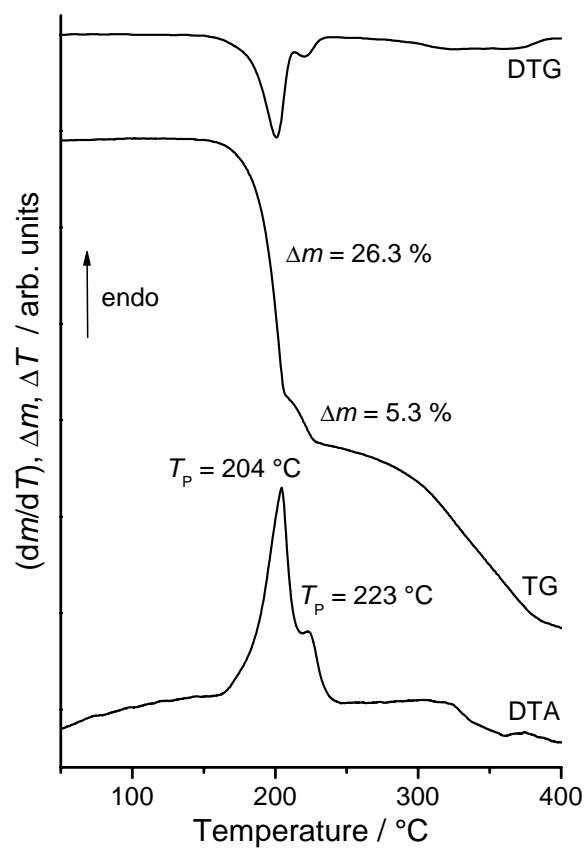

**Figure S10.** DTG, TG and DTA curves for compound **2**. Heating rate = 4 °C/min; given are the mass changes (%) and the peak temperatures  $T_p$  (°C).

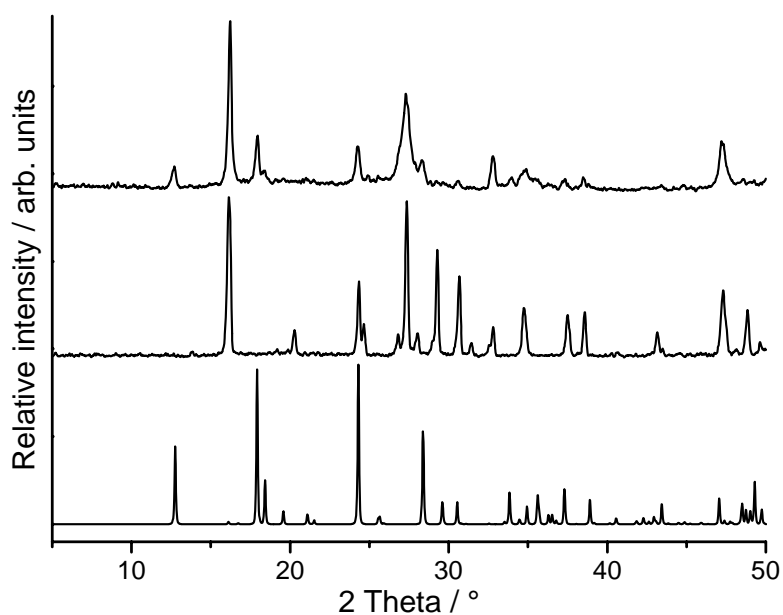

**Figure S11.** Experimental XRPD pattern of the intermediate obtained in the first heating step of compound **2** (top), experimental XRPD pattern of copper(I) thiocyanate obtained from Alfa Aesar (middle) and calculated XRPD pattern of  $[(\text{CuNCS})_2(\text{pyrazine})]_n$  (bottom).
